# Supplementary material for: Climate Benefit of Different Tree Species on Former Agricultural Land in Northern Europe
Source: MDPI journal article supplement (doi:10.3390/f12121810), 2021-12-20
Supplement: s1 [file s1]

## Description of growth modelling

The production estimates of the study were conducted by modeling the early growth (9 years) of the studied tree species (except willows) in the trials over Sweden [40]. After the growth simulations, the fractions of wood assortments were modelled (Suppl. figures 3). The modelling of the production is followed by the next steps:

1. Based on the mean early growth [40] of silver birch, hybrid aspen, poplar, Norway spruce and larch, the average height of each tree species was modelled in year basis with the according to Kiviste [50] and Kiviste & Kiviste [51] models (Equations S1–S4).

$$H_{A+1} = \frac{H+d+r}{2 + \frac{4 \cdot b \cdot (A+1)^{-a_1}}{H-d+r}}, \quad (S1)$$

$$b = a_0 - 1182; \quad (S2)$$

$$d = \frac{b}{50^{a_1}}; \quad (S3)$$

$$r = \sqrt{(H-d)^2 + 4 \cdot b \cdot \frac{H}{A^{a_1}}}; \quad (S4)$$

where  $b$ ,  $d$ ,  $r$  are support coefficients,  $a_0$  and  $a_1$  are coefficients according to the tree species (Table S1),  $A$  is the age (yr) and  $H$  is the height (m).

**Table S1.** Coefficients of the equations S1–S4 for the studied tree species

| Tree species            | $a_0$ | $a_1$ |
|-------------------------|-------|-------|
| Larch                   | 8319  | 1.58  |
| Norway spruce           | 12867 | 1.71  |
| Silver birch            | 4990  | 1.48  |
| Hybrid aspen and poplar | 3882  | 1.30  |

2. The stand density (trees ha<sup>-1</sup>) was calculated with the assumption of the natural tree mortality (Equation S5):

$$N_{A+1} = N \cdot 0.99, \quad (S5)$$

where  $N$  is the stand density (trees ha<sup>-1</sup>),  $A$  is the age (yr) of the plantation

3. The annual growth (stem volume, m<sup>3</sup> ha<sup>-1</sup> a<sup>-1</sup>) of each tree species was calculated with the following steps (Equations S6–S12) according to the Forest Planning Guidance [76]:

$$T = \frac{N \cdot \pi \cdot \frac{D^2}{4}}{b_0 + b_1 \cdot H + b_2 \cdot H^2 + b_3 \cdot \sqrt{H}}; \quad (S6)$$

$$\alpha = c_0 \cdot \frac{33.5 - H_{100}}{4} + c_1; \quad (S7)$$

$$\beta = \frac{c_2 \cdot \alpha + c_3}{100}; \quad (S8)$$

$$\gamma = c_4 \cdot \alpha + c_5; \quad (S9)$$

$$K_{Nsp} = \left[ \left( \frac{10.44}{A} + 1.24 \right) - \left( \frac{10.44}{A} + 0.24 \right) \cdot T \right] \cdot T; \quad (S10)$$

$$K_{other} = \left[ \left( \frac{1741}{A^2} + 0.87 \right) - \left( \frac{1741}{A^2} - 0.13 \right) \cdot T \right] \cdot T; \quad (S11)$$

$$\Delta V = \left\{ \alpha \cdot \beta \cdot \gamma \cdot [1 - e^{-\beta \cdot A}]^{\gamma-1} \cdot e^{-\beta \cdot A} \right\} \cdot K, \quad (S12)$$

where  $T$  (%) is the relative stand basal area to the standard at the given age,  $\alpha$ ,  $\beta$ ,  $\gamma$  are supporting coefficients,  $N$  is the stand density (trees ha<sup>-1</sup>),  $D$  is the quadratic mean stem diameter at breast height (cm),  $H$  is the average height of the plantation (m),  $H_{100}$  is the stand height at the age of 100 years (m),  $K_{Nsp}$  is the correction to  $T$  value for spruce and  $K_{other}$  for the other studied tree species,  $A$  is the age (yr) of the plantation,  $b_0$ ,  $b_1$ ,  $b_2$ ,  $b_3$ ,  $c_0$ ,  $c_1$ ,  $c_2$ ,  $c_3$ ,  $c_4$  and  $c_5$  are coefficients according to the tree species (Table S2 and S3) and  $\Delta V$  is the annual increment of stem volume (m<sup>3</sup> ha<sup>-1</sup> a<sup>-1</sup>).

**Table S2.** Coefficients of the equation S6 and S14 for the studied tree species

| Tree species            | $b_0$  | $b_1$   | $b_2$   | $b_3$   |
|-------------------------|--------|---------|---------|---------|
| Larch                   | -33.02 | -3.8531 | 0.0226  | 30.2955 |
| Norway spruce           | -7.94  | -0.5206 | 0.0069  | 10.8713 |
| Silver birch            | 11.65  | 2.0183  | -0.0155 | -4.4908 |
| Hybrid aspen and poplar | 7.93   | 1.4932  | -0.0076 | -0.9684 |

**Table S3.** Coefficients of the equations S7–S9 for the studied tree species.

| Tree species            | $c_0$  | $c_1$  | $c_2$  | $c_3$  | $c_4$   | $c_5$  |
|-------------------------|--------|--------|--------|--------|---------|--------|
| Larch                   | -127.1 | 1225.0 | 0.0007 | 1.0952 | -0.0005 | 2.4787 |
| Norway spruce           | -145.8 | 1351.7 | 0.0005 | 1.7668 | -0.0018 | 4.9657 |
| Silver birch            | -107.6 | 821.4  | 0.0011 | 1.7771 | -0.0015 | 3.2267 |
| Hybrid aspen and poplar | -150.7 | 1057.6 | 0.0007 | 1.9665 | 0.0002  | 1.7283 |

4. The dynamical (for the following growth year) quadratic mean stem diameter at the breast height (Equations S13–S15) is calculated according to the Forest Planning Guidance [76]:

$$T = \frac{V + \Delta V}{d_0 + d_1 \cdot H_{A+1} + d_2 \cdot H_{A+1}^2 + d_3 \cdot H_{A+1}^3}; \quad (S13)$$

$$G_{A+1} = T \cdot (b_0 + b_1 \cdot H + b_2 \cdot H^2 + b_3 \cdot \sqrt{H}); \quad (S14)$$

$$D_{A+1} = \sqrt{\frac{40000 \cdot G_{A+1}}{\pi \cdot N}}, \quad (S15)$$

where  $T$  (%) is the relative stand basal area to the standard at the following year,  $V$  is stem volume (m<sup>3</sup> ha<sup>-1</sup>),  $\Delta V$  is the annual increment of stem volume (m<sup>3</sup> ha<sup>-1</sup> a<sup>-1</sup>),  $H$  is the average height of the plantation (m),  $d_0$ ,  $d_1$ ,  $d_2$ ,  $d_3$ ,  $b_0$ ,  $b_1$ ,  $b_2$ ,  $b_3$  are coefficients according of the tree species (Table S2 and S4),  $G$  is stand basal area (m<sup>2</sup> ha<sup>-1</sup>),  $N$  is stand density (trees ha<sup>-1</sup>) and  $D$  is the quadratic mean stem diameter at breast height (cm).

**Table S4.** Coefficients of the equation S13 for the studied tree species

| Tree species            | $d_0$ | $d_1$   | $d_2$   | $d_3$   |
|-------------------------|-------|---------|---------|---------|
| Larch                   | -23.7 | 17.9947 | -0.0108 | -0.0003 |
| Norway spruce           | -17.3 | 13.4278 | 0.1440  | 0.0029  |
| Silver birch            | 50.2  | -4.7970 | 0.9508  | -0.0116 |
| Hybrid aspen and poplar | 33.5  | -0.8948 | 0.8134  | -0.0078 |

5. The applicability of thinnings was modelled with the principles of Equations S16 and S17. If  $L > L_{re}$  then no thinning is applied in the management model. If  $L < L_{re}$  then thinning rate was applied with the Equations of 18 and 19.

$$L_{re} = 0.95 \cdot (e_0 + e_1 \cdot D + e_2 \cdot H_{100}); \quad (S16)$$

$$L = \frac{10000}{\sqrt{N}}, \quad (S17)$$

where  $L_{re}$  is the stand sparsity before thinning (cm),  $D$  is the quadratic mean stem diameter at breast height (cm),  $H_{100}$  is the stand height at the age of 100 years (m),  $e_0$ ,  $e_1$ ,  $e_2$  are coefficients according of the tree species (Table S5),  $L$  is the stand sparsity (cm) and  $N$  is the stand density (trees ha<sup>-1</sup>).

$$L_{rj} = f_0 + f_1 \cdot D + f_2 \cdot H_{100}; \quad (S18)$$

$$N_{raie} = N - \frac{10^8}{L_{rj}^2}; \quad (S19)$$

$$Rk = \frac{N_{thin}}{N}, \quad (S20)$$

where  $L_{rj}$  is stand sparsity after thinning (cm),  $D$  is the quadratic mean stem diameter at breast height (cm),  $H_{100}$  is the stand height at the age of 100 years (m),  $f_0$ ,  $f_1$ ,  $f_2$  are coefficients according of the tree species (Table S5),  $N_{thin}$  the number of trees that were cut out during the thinning (trees ha<sup>-1</sup>),  $N$  stand density before thinning (trees ha<sup>-1</sup>) and  $R_k$  is the proportion of thinned trees from the stand density (thinning intensity).

**Table S5.** Coefficients of the equations S16 and S18 for the studied tree species

| Tree species                          | $e_0$ | $e_1$ | $e_2$ | $f_0$ | $f_1$ | $f_2$ |
|---------------------------------------|-------|-------|-------|-------|-------|-------|
| Larch                                 | 143.6 | 14.2  | 3.4   | 166.8 | 15.2  | 3.7   |
| Norway spruce                         | 91.8  | 12.9  | 1.2   | 121.6 | 13.3  | 1.9   |
| Silver birch, hybrid aspen and poplar | 71.4  | 14.7  | 0.0   | 105.0 | 16.8  | 0.0   |

6. The fractions of harvested stemwood assortments were calculated according to the stem diameter (at breast height) distribution classes. After dividing trees to the stem diameter classes, the mean height for each diameter class was modelled with Equation S21:

$$h = \frac{H \cdot \left[ 1.3 + g_0 \cdot \left( \frac{d}{d+g_1} \right)^{g_2} \right]}{1.3 + g_0 \cdot \left( \frac{D}{D+g_1} \right)^{g_2}}, \quad (S21)$$

where  $h$  tree height at the diameter class (m),  $H$  is the average height of the plantation (m),  $d$  is the mean diameter of the diameter class (cm),  $D$  is the quadratic mean stem diameter at breast height (cm) and  $g_0$ ,  $g_1$ ,  $g_2$  are coefficients according of the tree species (Table S6).

**Table S6.** Coefficients of the equation S21 for the studied tree species.

| Tree species            | $g_0$   | $g_1$ | $g_2$   |
|-------------------------|---------|-------|---------|
| Larch                   | 32.7621 | 1.1   | 9.9241  |
| Norway spruce           | 37.2351 | 1.3   | 10.8580 |
| Silver birch            | 31.9851 | 8.0   | 1.4625  |
| Hybrid aspen and poplar | 31.6953 | 4.3   | 2.4979  |

If the subject tree is less than 8 cm in diameter or 5 m in height, then only its volume is calculated (Equation S22). If the subject tree is more than 8 cm in diameter and more than 5 m in height, then the tree stem is divided to the following assortments: logs, pulpwood and energywood. The length of each assortment is 3.0 m. The fraction (%) of each assortment was calculated by using Ozoliņš [52] stem taper model (Equations S23–S24). The fraction of bark was calculated with Padari [77] (Equation S25) and the diameter without bark with Equation S26. The volume of each wood assortment was calculated by using integrate method [52,77] (Equation S27). After that, the volumes of the calculated wood assortments will be summed with the normalization to the stand volume (Equation S28).

$$v_{tree} = 0.000019 + 0.00001142 \cdot (d + 2)^{2.61614} \cdot h^{0.76489}, \quad (S22)$$

where  $v_{tree}$  is stem volume of an individual tree ( $m^3$ ),  $d$  is the stem diameter at breast height,  $h$  is the tree height (m).

$$\gamma(x) = 1 + (x^2 - 0,01) \cdot (p \cdot (h - h_0) + q \cdot (d_{1,3} - d_0)); \quad (S23)$$

$$d_l = d_{1,3} \cdot \frac{\gamma\left(\frac{l}{h}\right) \cdot \left(a_0 + a_1 \cdot \left(\frac{l}{h}\right) + a_2 \cdot \left(\frac{l}{h}\right)^2 + a_3 \cdot \left(\frac{l}{h}\right)^3 + a_4 \cdot \left(\frac{l}{h}\right)^4 + a_5 \cdot \left(\frac{l}{h}\right)^5 + a_6 \cdot \left(\frac{l}{h}\right)^6\right)}{\gamma\left(\frac{1,3}{h}\right) \cdot \left(a_0 + a_1 \cdot \left(\frac{1,3}{h}\right) + a_2 \cdot \left(\frac{1,3}{h}\right)^2 + a_3 \cdot \left(\frac{1,3}{h}\right)^3 + a_4 \cdot \left(\frac{1,3}{h}\right)^4 + a_5 \cdot \left(\frac{1,3}{h}\right)^5 + a_6 \cdot \left(\frac{1,3}{h}\right)^6\right)}, \quad (S24)$$

where  $\gamma(x)$  is the perturbation coefficient ( $x = \frac{l}{h} \text{ v} \ddot{o} i \frac{1,3}{h}$ ),  $d_l$  is the stem diameter at distance  $l$  from the root collar (cm),  $d_{1,3}$  is the stem diameter at breast height (cm),  $l$  is the distance from the root collar (m),  $h$  is the tree height (m) and  $a_0, a_1, a_2, a_3, a_4, a_5, a_6$  are coefficients according of the tree species (Table S7).

**Table S7.** Coefficients of the equation S24 for the studied tree species

| Tree species            | $a_0$   | $a_1$    | $a_2$    | $a_3$     | $a_4$    | $a_5$     | $a_6$    |
|-------------------------|---------|----------|----------|-----------|----------|-----------|----------|
| Larch                   | 118.981 | -277.578 | 1140.525 | -3037.487 | 4419.682 | -3361.78  | 997.657  |
| Norway spruce           | 113.939 | -203.061 | 827.209  | -2161.251 | 2732.076 | -1699.667 | 390.755  |
| Silver birch            | 120.567 | -312.074 | 1388.288 | -3725.819 | 5197.005 | -3788.858 | 1120.891 |
| Hybrid aspen and poplar | 120.224 | -310.985 | 1450.125 | -4238.703 | 6644.011 | -5408.312 | 1743.64  |

$$Bark = h_0 \cdot \left( \frac{d+h_1}{d+h_1+1} \right)^{h_2}, \quad (S25)$$

where  $Bark$  is the fraction of bark (%),  $d$  is the stem diameter (cm) and  $h_0, h_1, h_2$  are coefficients according of the tree species (Table S8).

**Table S8.** Coefficients of the equation 25 for the studied tree species

| Tree species            | $h_1$ | $h_2$ | $h_3$ |
|-------------------------|-------|-------|-------|
| Larch and Norway spruce | 0.080 | 2     | -4.9  |
| Silver birch            | 0.111 | 3     | -4.9  |
| Hybrid aspen and poplar | 0.120 | 2     | -3.2  |

$$d_{ub} = \frac{d_{ob}}{\sqrt{1+Bark}},$$

(S26)

where  $d_{ub}$  is the stem diameter under the bark (cm),  $d_{ob}$  is the stem diameter over the bark (cm) and  $Bark$  is the share of the bark from the total volume (%).

$$v = \frac{\pi}{40000} \int_{l_1}^{l_2} d_l^2 dl,$$

(S27)

where  $v$  is the volume (m<sup>3</sup>) of the wood assortment from the distance of root collar ( $l_1$  to  $l_2$ ),  $l$  is the distance from the root collar (m) and  $d_l$  is the stem diameter at distance  $l$  from the root collar (cm).

$$V_{assortment} = \frac{V \cdot \Sigma v_{assortment}}{\Sigma v_{tree}},$$

(S28)

where  $V_{assortment}$  is the volume of saw log, pulpwood or energywood in the plantation (m<sup>3</sup>),  $V$  is the stem volume of the plantation (m<sup>3</sup>),  $v_{assortment}$  is the volume of wood assortment according to the diameter class (m<sup>3</sup>) and  $v_{tree}$  is the volume of the tree in the diameter class (m<sup>3</sup>).

The volume of obtained wood assortments was corrected with the share of potential stem damages according to Padari [77] model (Equation S29).

$$Dam = \left( \frac{A}{A+1} \right) \left[ \left( \frac{i_0}{A} \right)^{i_1} \right],$$

(S29)

where  $Dam$  is the share of damaged wood (%),  $A$  is the age of the plantation (yr),  $i_0$ ,  $i_1$  coefficients according of the tree species (Table S9).

**Table S9.** Coefficients of the equation 30 for the studied tree species

| Tree species  | $i_0$     | $i_1$ |
|---------------|-----------|-------|
| Larch         | 9,000,000 | 0.5   |
| Norway spruce | 1,300,00  | 0.5   |

|                         |     |     |
|-------------------------|-----|-----|
| Silver birch            | 700 | 2   |
| Hybrid aspen and poplar | 145 | 2.5 |

**Supplementary figure 1 title: Site index curves**

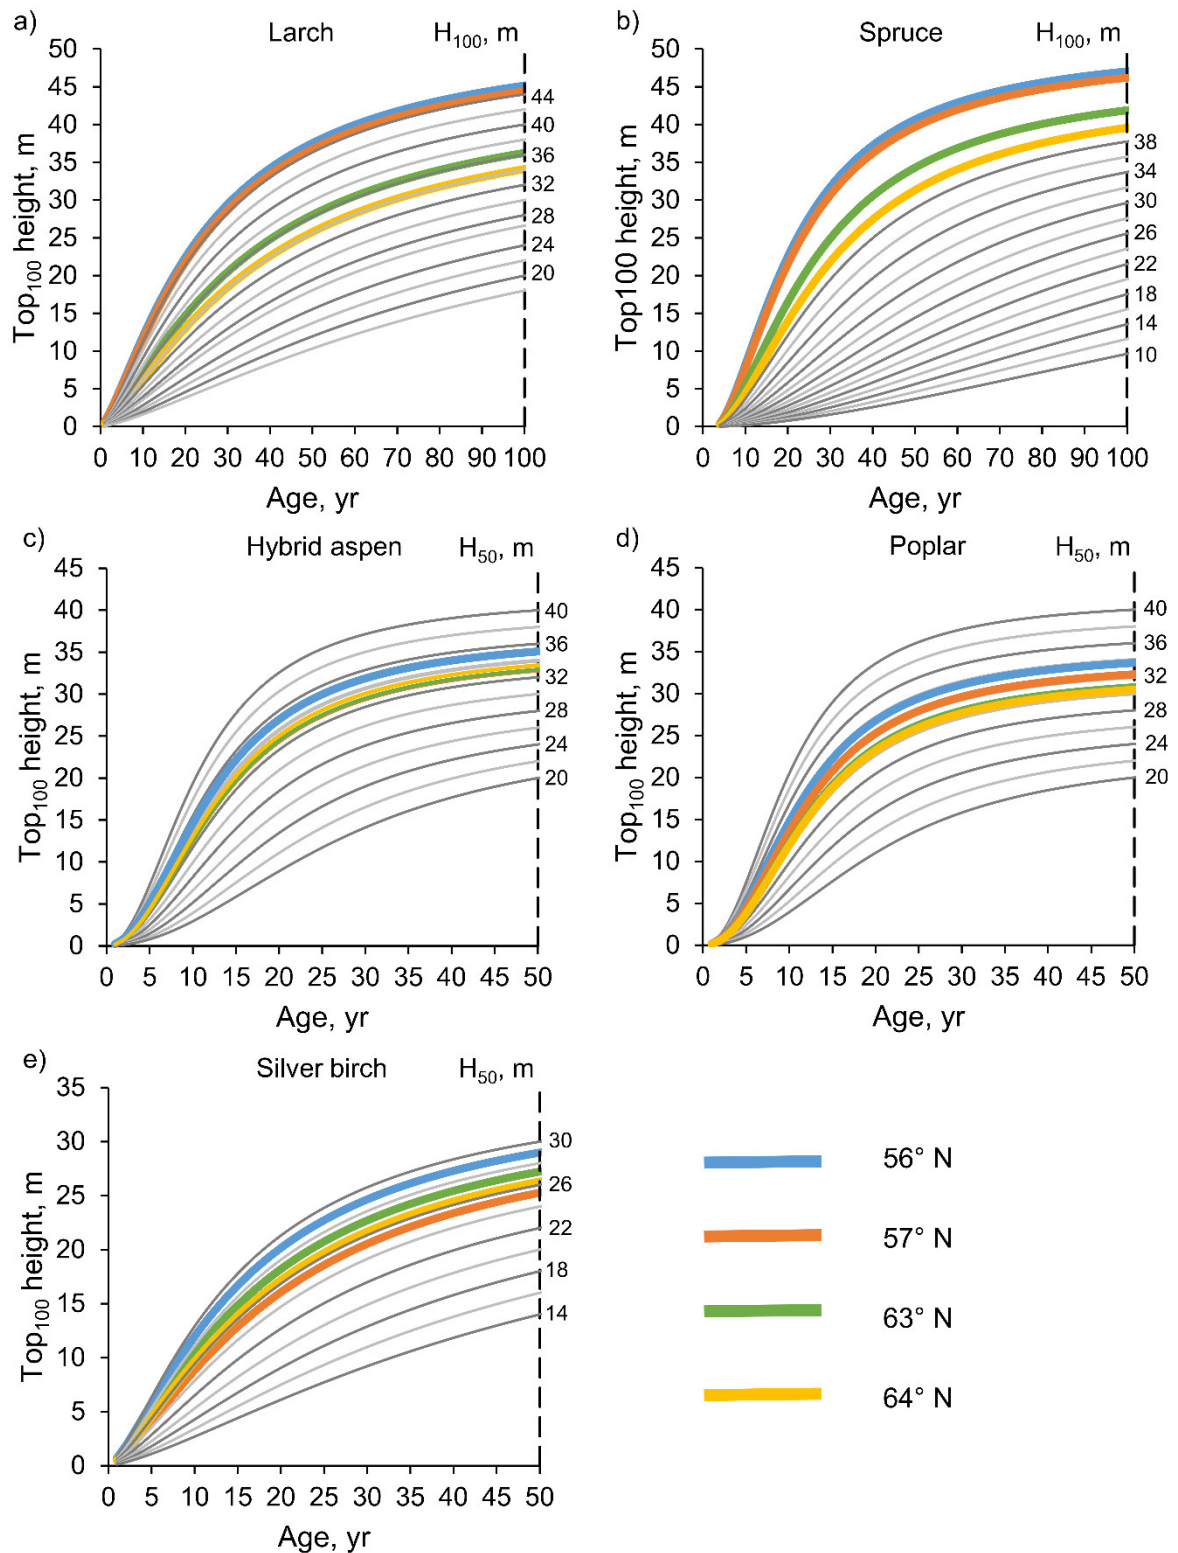

**Figure S1.** Site index curves for larch (a), spruce (b), hybrid aspen (c), poplar (d) and silver birch according to Johansson et al. [48] curve. The colored lines presents tree species trials at the latitudes from 56° to 64°N where the early growth (9 years) of the 100 thickest trees per ha was used (Adapted from [40]). The grey lines are presenting the site index curves for the given tree species in Sweden at the reference age of 50 or 100 [48].

Supplementary figure 2 title: Predicted production

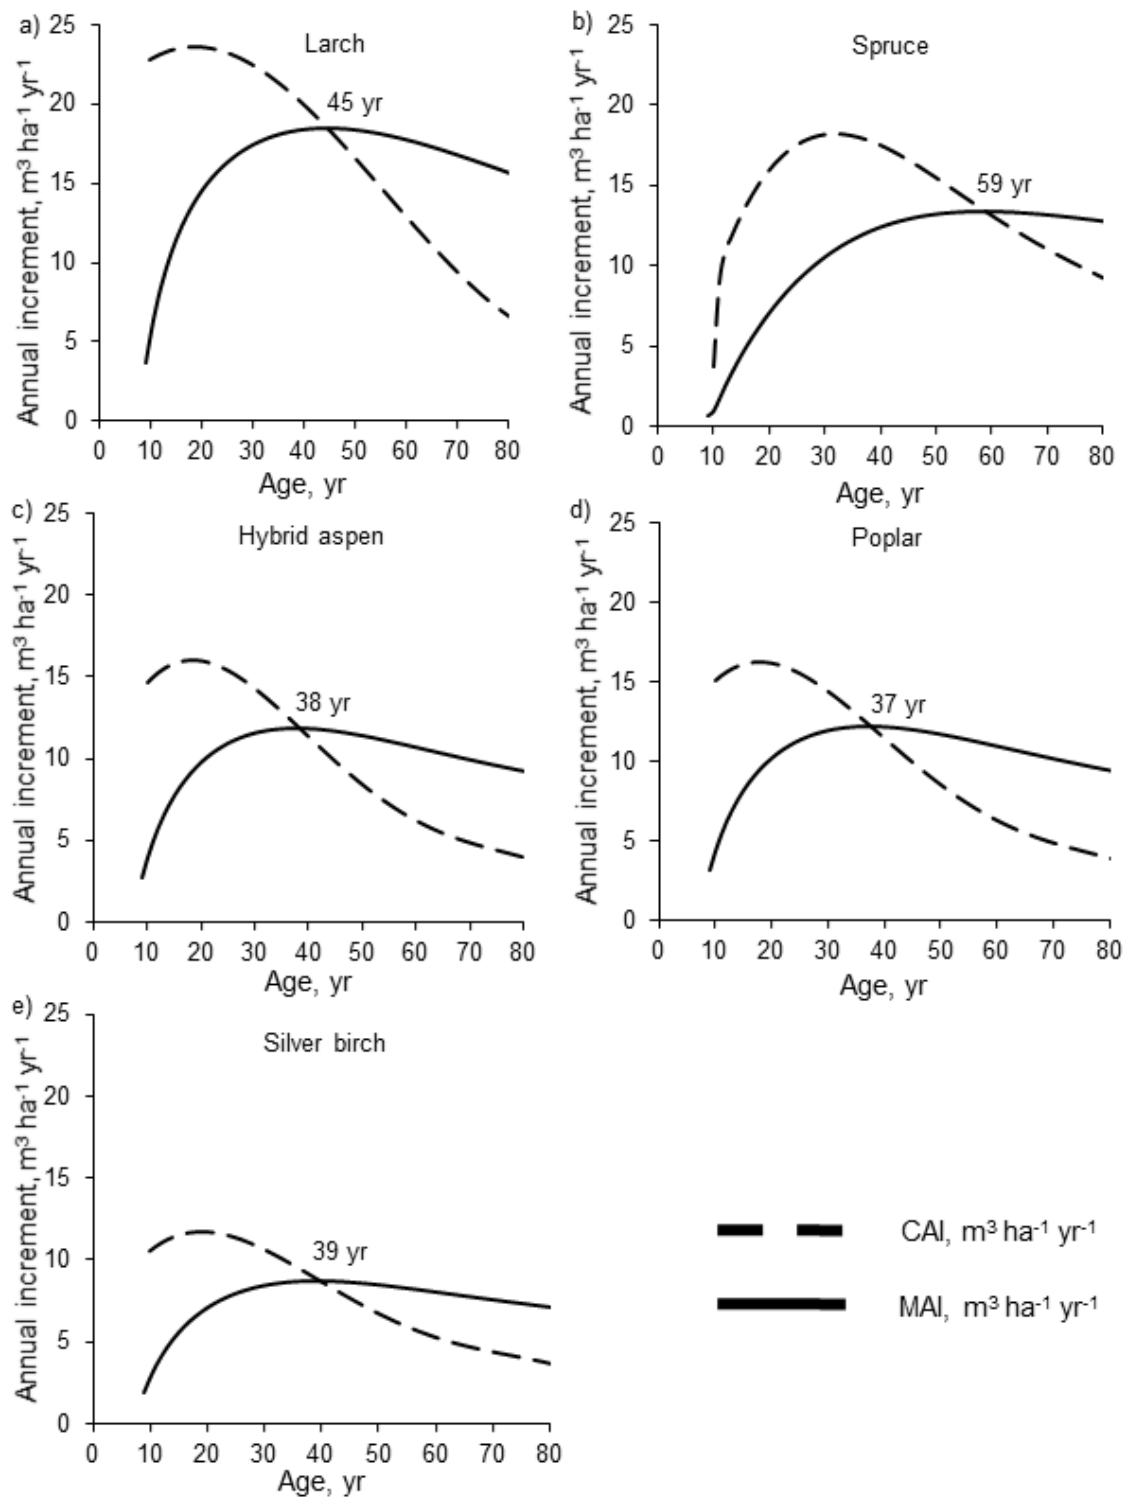

**Figure S2.** Current annual increment (CAI, m³ ha⁻¹ yr⁻¹) and mean annual increment (MAI, m³ ha⁻¹ yr⁻¹) of larch (a), spruce (b), hybrid aspen (c), poplar (d) and silver birch.



**Supplementary figure 3 title: Fraction of wood assortments**

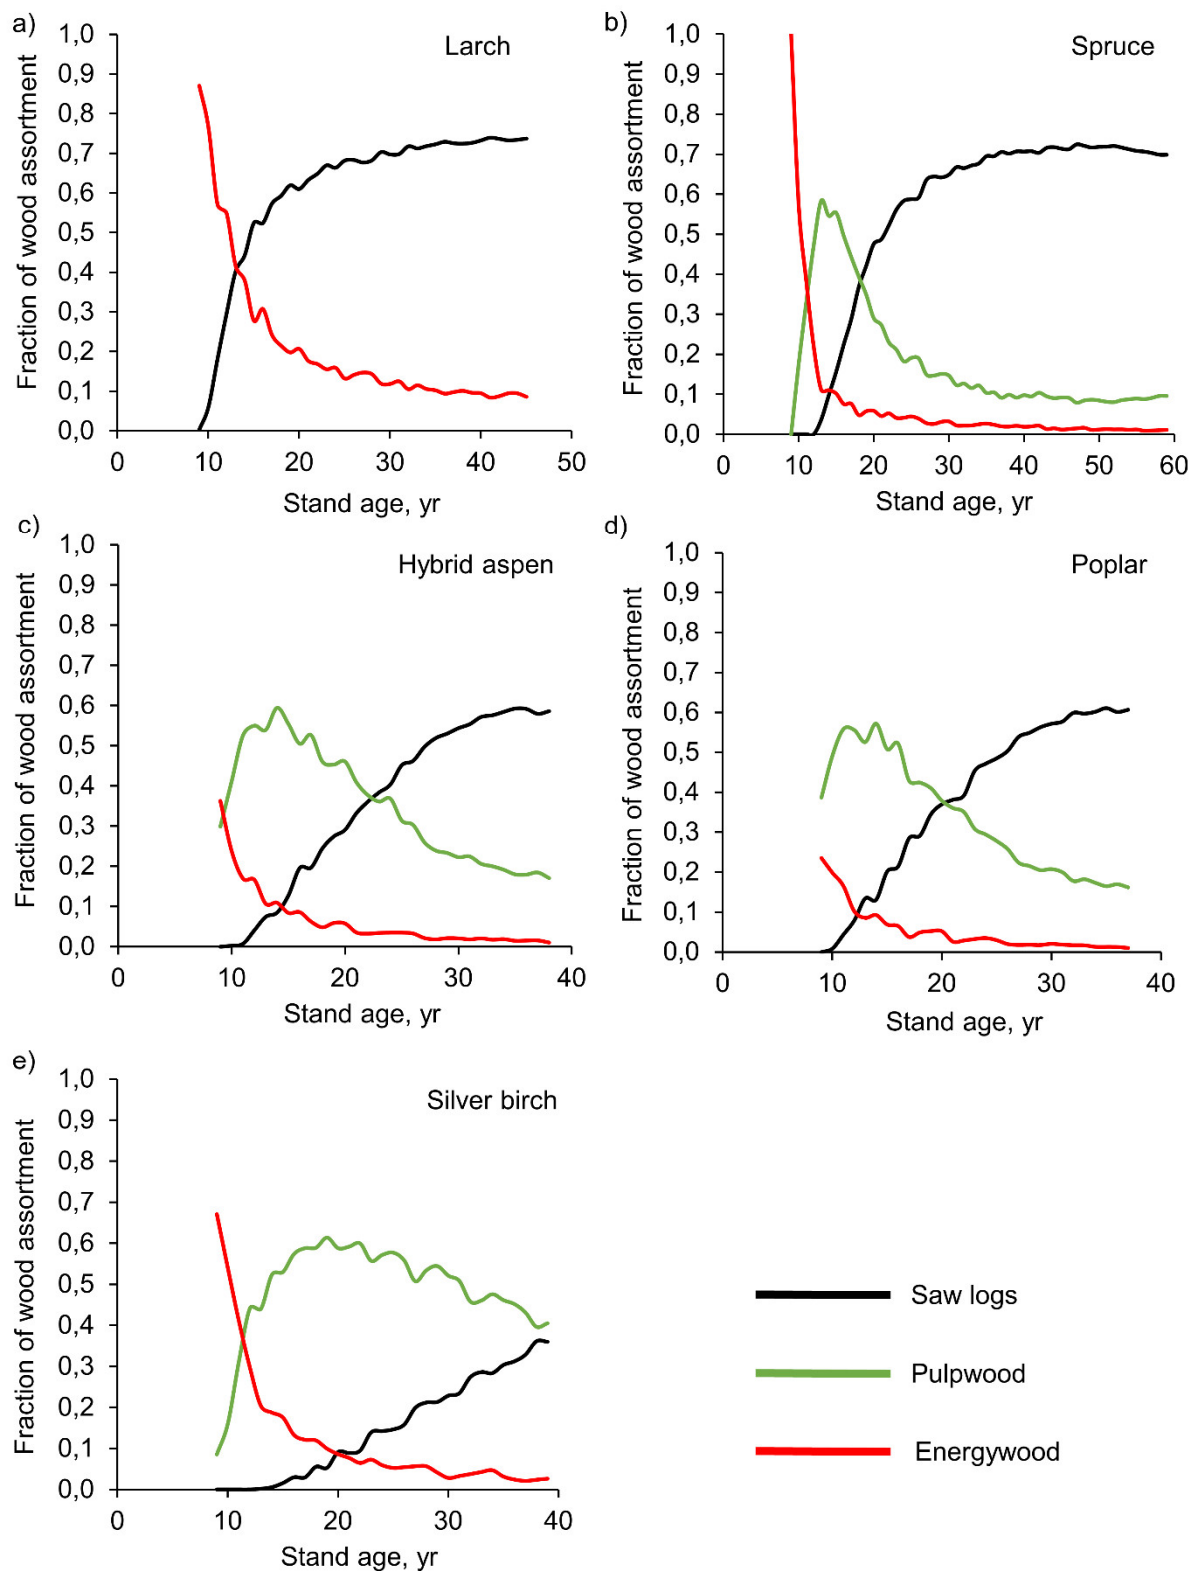

**Figure S3.** The dynamical development of wood assortment fractions (energywood, pulpwood and saw logs) of the studied tree species according to Ozolinš [52] model.
